# Supplementary material for: Efficient hydrogen evolution by reconstruction of NiMoO4–CoO via Mo recombination
Source: Royal Society of Chemistry journal article supplement (doi:10.1039/d2qi00597b), 2022-01-01
Supplement: d2qi00597b1.pdf [file d2qi00597b1.pdf]

**Supplementary Information**

## **Efficient hydrogen evolution by reconstruction of NiMoO<sub>4</sub>- CoO via Mo recombination**

**Juejin Teng, Zhixin Dong, Daokun Liu, Xiao Zhang,\* Jinxue Guo\***

*Key Laboratory of Optic-electric Sensing and Analytical Chemistry for Life Science, MOE, Key*

*Laboratory of Biochemical Analysis, Shandong Province, College of Chemistry and Molecular*

*Engineering, Qingdao University of Science & Technology, Qingdao 266042, China*

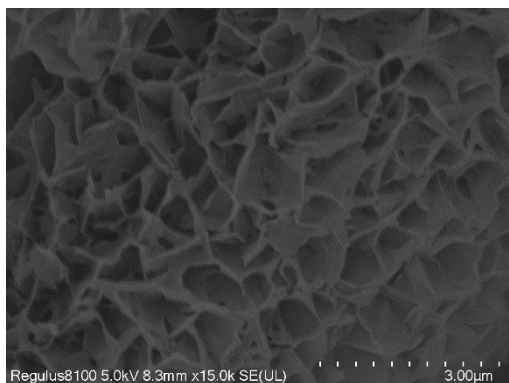

**Fig. S1** SEM of NiCoMo-LDH/CC precursor.

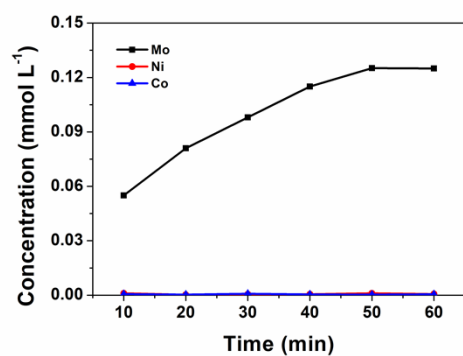

**Fig. S2** Time dependent concentration of dissolved Mo, Ni, and Co in the electrolyte of NiMoO<sub>4</sub>-CoO/CC.

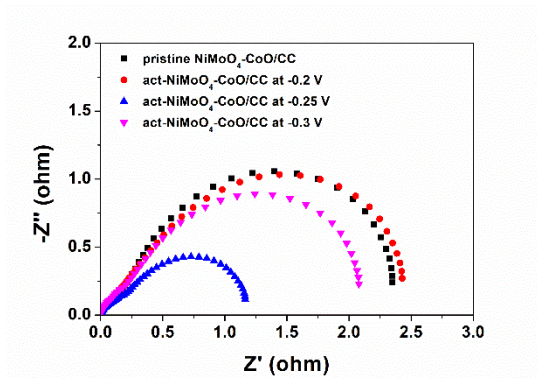

**Fig. S3** Nyquist plots of pristine NiMoO<sub>4</sub>-CoO/CC, act-NiMoO<sub>4</sub>-CoO/CC at -0.2 V, act-NiMoO<sub>4</sub>-CoO/CC at -0.25 V, and act-NiMoO<sub>4</sub>-CoO/CC at -0.3 V.

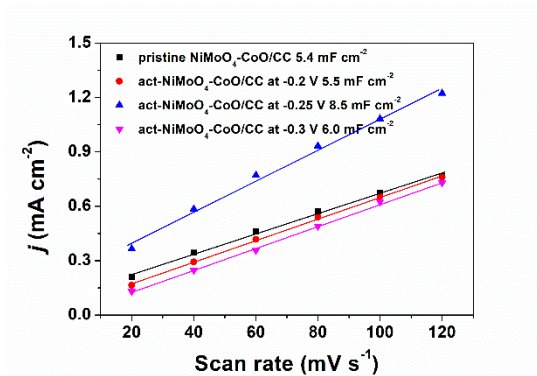

**Fig. S4** The capacitive currents as a function of scan rate for pristine NiMoO<sub>4</sub>-CoO/CC, act-NiMoO<sub>4</sub>-CoO/CC at -0.2 V, act-NiMoO<sub>4</sub>-CoO/CC at -0.25 V, and act-NiMoO<sub>4</sub>-CoO/CC at -0.3 V.

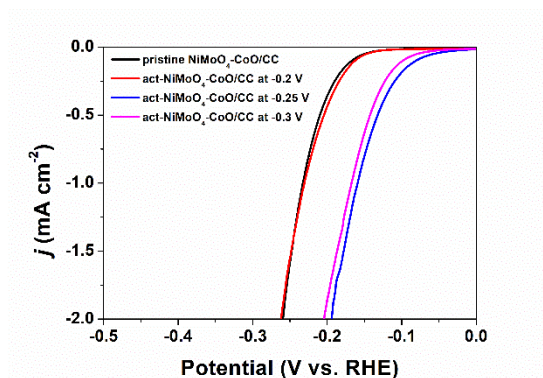

**Fig. S5** ECSA normalized HER activities of pristine NiMoO<sub>4</sub>-CoO/CC, act-NiMoO<sub>4</sub>-CoO/CC at -0.2 V, act-NiMoO<sub>4</sub>-CoO/CC at -0.25 V, and act-NiMoO<sub>4</sub>-CoO/CC at -0.3 V.

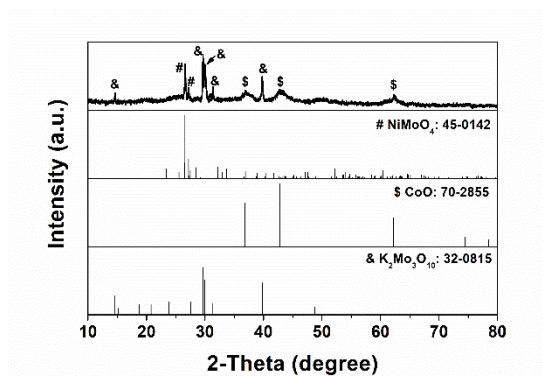

**Fig. S6** XRD pattern of act-NiMoO<sub>4</sub>-CoO/CC at -0.25 V.

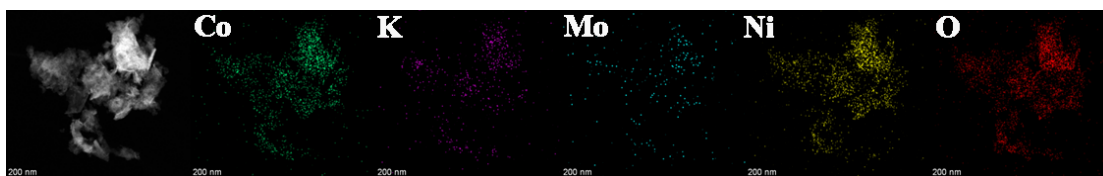

**Fig. S7** EDX elemental mapping of Co, K, Mo, Ni, and O elements for act-NiMoO<sub>4</sub>-CoO/CC at -0.25 V.

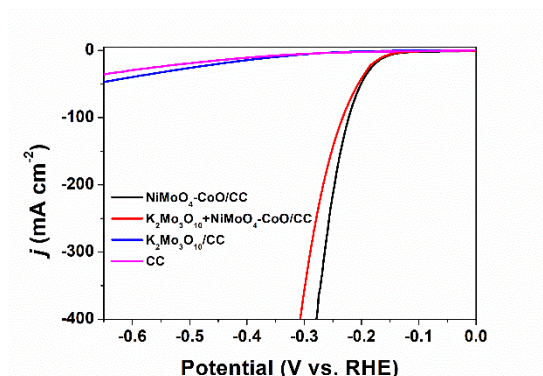

**Fig. S8** LSV curves of NiMoO<sub>4</sub>-CoO/CC, K<sub>2</sub>Mo<sub>3</sub>O<sub>10</sub>+NiMoO<sub>4</sub>-CoO/CC, K<sub>2</sub>Mo<sub>3</sub>O<sub>10</sub>/CC, and CC.

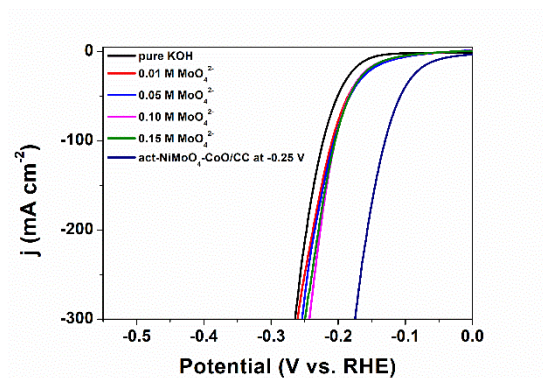

**Fig. S9** LSV curves of NiMoO<sub>4</sub>-CoO/CC in 1 M pure KOH, and 1 M KOH with the addition of 0.01, 0.05, 0.10, and 0.15 M MoO<sub>4</sub><sup>2-</sup>, as well as the LSV curve of act-NiMoO<sub>4</sub>-CoO/CC at -0.25 V.

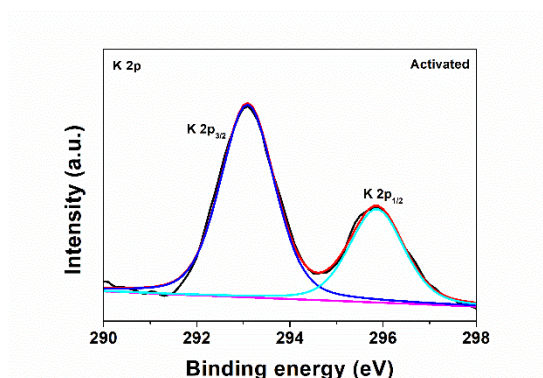

**Fig. S10** High-resolution K 2p spectrum of act-NiMoO<sub>4</sub>-CoO/CC at -0.25 V.

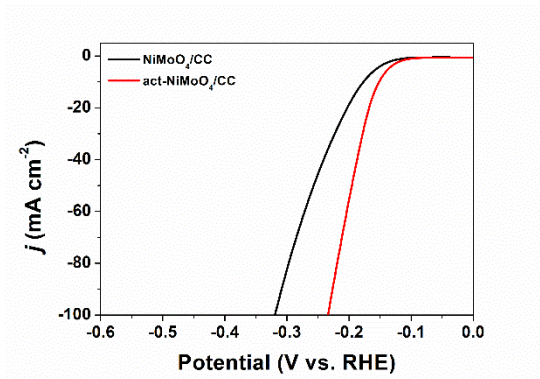

Fig. S11 LSV curves of initial NiMoO<sub>4</sub>/CC and act-NiMoO<sub>4</sub>/CC.

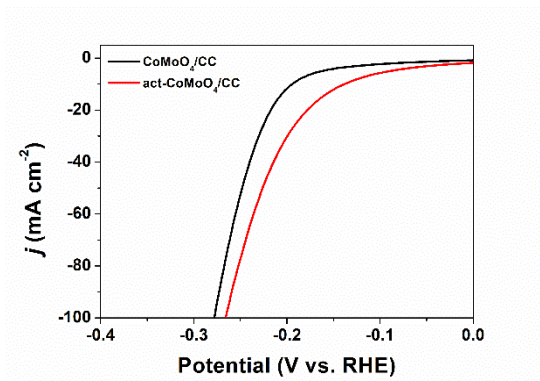

Fig. S12 LSV curves of initial CoMoO<sub>4</sub>/CC and act-CoMoO<sub>4</sub>/CC.

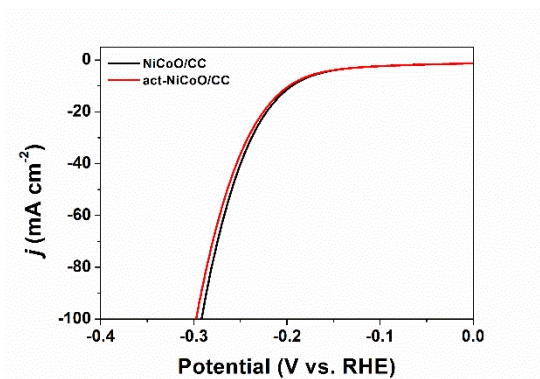

Fig. S13 LSV curves of initial NiCoO/CC and act-NiCoO/CC.

**Table S1. The atomic ratios of various elements on the surface of prepared NiMoO<sub>4</sub>-CoO/CC and act-NiMoO<sub>4</sub>-CoO/CC at -0.25 V obtained from EDX**

| Element | NiMoO <sub>4</sub> -CoO/CC (%) | act-NiMoO <sub>4</sub> -CoO/CC at -0.25 V (%) |
|---------|--------------------------------|-----------------------------------------------|
| Ni      | 12.46                          | 12.87                                         |
| Co      | 12.72                          | 12.17                                         |
| Mo      | 7.83                           | 3.31                                          |
| K       | N/A                            | 3.22                                          |
